# Supplementary material
Source: MDPI journal article supplement (https://www.mdpi.com/2076-3263/7/4/97)
Supplement: s1 [file s1]

## Sheet: Arkusz1
	Site name	Source	1800s surroundings	change between 1800s and 1940s	1940s surroundings	change between 1940s and 1968-69	1968-1969 surroundings	1972 surroundings	change between 1972 and 2013	2013 sourroundings	change between 1800s and 2013	Inside Archaeological Hazard Zone		Changes visiable thourgh nowadays high resolution satellite images
1	El-Nawahid	31,32	desert	0	desert	0	desert	desert	1	desert, agriculture	1	yes	1	not possibile to estimate
2	El-Ka'imat	31	desert, agriculutre	1	agriculutre	0	agriculture	agriculture	0	agriculture	0	yes	1	no	0
3	el-Amra	5,31,32	desert	0	desert	0	desert	desert	1	desert, agricultre, urban	1	no	0	no	0
4	El-Sheikh Waqqad	31,32	desert	0	desert	0	desert	desert	1	desert, agriculture	1	no	0	yes	1
5	El-Baraghit	31,32	desert	0	desert	0	desert	desert	1	agriculture	1	yes	1	yes	1
6	El-Hagg Sallam	31	desert	0	desert	0	desert	desert	1	desert, agriculture	1	no	0	yes	1
7	El-Dahasa	31	desert	1	desert, agriculutre	0	desert, agriculutre	desert, agriculture	1	agriculture	1	yes	1	no	0
8	Kom El-Ahmar Farshut	31	desert	0	desert	1	desert, agriculture	desert, agriculture	1	agriculture, urban	1	yes	1	no	0
9	Gebel El-'Arqi	31	desert	0	desert	0	desert	desert	1	agriculture, urban	1	yes	1	no	0
10	Hiw	31	agriculture, urban	0	agriculture, urban	0	agriculture, urban	agriculture, urban	1	urban	0	no	0	not possibile to estimate
11	El-Halfaya Qibli	5,31,32,33	desert	0	desert	0	desert	desert	1	desert, agriculture	1	yes	1	yes	1
12	El-Salamiya S	5,31,32,33	desert	0	desert	0	desert	desert	1	desert, agriculture, urban	1	yes	1	yes	1
13	Hur	5,31,33	desert	0	desert	0	desert	desert	1	desert, agriculture	1	yes	1	yes	1
14	Abu 'Amuri	31, 32	desert	0	desert	0	desert	desert,agriculture	1	agriculture, urban	1	yes	1	yes	1
15	El-Salamiya N	31	agriculutre	0	agriculutre	0	agriculutre	agriculture	1	agriculture, urban	1	no	0	not possibile to estimate
16	Hamra Dom	31	desert	0	desert	0	desert	desert	0	desert	0	no	0	no	0
17	El-Marashda	31,32	desert	0	desert	0	desert	desert	1	agriculture	1	yes	1	not possibile to estimate
18	El-Waqf	31	desert	1	desert, agriculutre	0	desert, agriculutre	agricultre	0	agriculture	1	no	0	yes	1
19	Abu Manna' Bahar	31	desert	0	desert	0	desert	desert	1	desert, urban	0	no	0	not possibile to estimate
20	Mahkadma	32	desert, agriculutre	0	desert, agriculutre	0	desert, agriculutre	desert, agriculture	1	desert, agriculture, urban	1	yes	1	not possibile to estimate
21	Dendera	5,6,31,32	desert, agriculture	0	desert, agriculture	0	desert, agriculture	desert, urban	1	desert, agriculture, urban	1	no	0	no	0
22	Nag' El-Gaziriya	32	desert	1	agriculutre	0	agriculture	agriculture	0	agriculture	1	no	0	not possibile to estimate
23	Deir El-Ballas	31,32	desert	1	desert, agriculutre	0	desert, agriculture	desert, agriculture	0	agriculture, urban	1	yes	1	no	0
24	Qift	31	agriculture, urban	1	urban	0	urban	urban	0	urban	1	no	0	not possibile to estimate
25	El-Qal'a	31	agriculture, urban	1	urban	0	urban	urban	0	urban	1	no	0	not possibile to estimate
26	Kom El-Moominin	31	agriculture	0	agriculture	0	agriculture	agriculture	0	agriculture	0	no	0	not possibile to estimate
27	Nag' El-Higeiri	31	desert	0	desert	0	desert	desert	1	desert, agriculture	1	yes	1	yes	1
28	Nag el-Hai	32	desert	0	desert	1	desert, agriculture	desert, agriculture	1	agriculture	1	yes	1	yes	1
29	Shurafa	32	desert	0	desert	0	desert	desert, agriculture	1	agriculture	1	yes	1	yes	1
30	Shanhur	31	agriculutre	0	agriculture	0	agriculture	agriculture	1	agriculture, urban	1	yes	1	not possibile to estimate
31	Qus	31	agriculutre	0	agriculture	0	agriculture, urban	agriculture, urban	0	agriculture, urban	1	no	0	not possibile to estimate
32	El-Zawayda	31	agriculutre	0	agriculutre	0	agriculutre	agriculture	1	agriculture, urban	1	yes	1	no	0
33	Tukh	31	agriculutre	0	agriculutre	0	agriculutre	agriculture	1	agriculture, urban	1	yes	1	not possibile to estimate
34	Nagada	31,32	desert, agriculutre	0	desert, agricultre	0	desert, agriculutre	desert, agriculutre	0	desert, agriculture	0	no	0	yes	1
35	Danfiq	31	desert, agriculutre	0	desert, agricultre	0	desert, agriculutre	desert, agriculutre	0	desert, agriculture	0	yes	1	yes	1
36	Ab'adiya	31	desert, agriculutre	0	desert, agriculture	0	desert, agriculutre	desert, agriculutre	0	desert, agriculture	0	yes	1	yes	1
37	El-Bahhari Qamula	31	agriculuture	0	agriculture	1	agriculture, urban	agriculture, urban	0	agriculture, urban	1	no	0	not possibile to estimate
38	Khozam	31,32	desert	0	desert	0	desert	desert	1	agriculture	1	yes	1	yes	1
39	Medinet Armant El-Heit	31	agriculture, urban	1	urban	0	urban	urban	0	urban	1	no	0	no	0
40	Temple of Armant El-Heit	5,31	urban	0	urban	0	urban	urban	0	urban	0	no	0	no	0
41	Remains of the pylon of the Temple of Cleopatra VII	5,31	urban	0	urban	0	urban	urban	0	urban	0	no	0	no	0
42	Hagir Armant El-Heit	31,32	desert	1	desert, agriculture	0	desert, agriculture	desert, agriculture	1	agriculture, urban	1	yes	1	yes	1
43	El-Rizeiqat	31,32	desert	1	desert, agriculutre	0	desert, agriculutre	desert, agriculture	0	desert, agriculture, urban	1	yes	1	yes	1
44	El-Mahamid Qibli	31	urban	0	urban	0	urban	urban	0	urban	0	no	0	not possibile to estimate
45	Gebelein West	5, 31,32	desert	0	desert	0	desert	desert	1	desert, agriculture, urban	1	yes	1	yes	1
46	Gebelein East	5, 31,32	desert, agriculture, urban	0	desert, agriculture, urban	0	desert, agriculture, urban	desert, agriculture, urban	1	agriculture, urban	0	yes	1	yes	1
47	El-Dibabiya	31	desert	0	desert	0	desert	desert	0	desert	0	no	0	no	0
48	Nag ' El-Qada	31	desert	0	desert	0	desert	desert	0	desert	0	no	0	no	0
49	Tombs of Mo'alla	31	desert	0	desert	0	desert	desert	0	desert	0	no	0	no	0
50	El-Tinab	31	desert	0	desert	0	desert	desert, urban	1	agriculture, urban	1	yes	1	yes	1
51	Nag El'Hanadi	31	desert	0	desert	0	desert	desert	1	agriculture	1	yes	1	yes	1
52	Asfun El-Mata'na	31	urban	0	urban	0	urban	urban	0	urban	0	no	0	not possibile to estimate
53	Medinat Esna	31	urban, agriculutre	1	urban	0	urban	urban	0	urban	1	no	0	no	0
54	Temple of Isna	5,31	urban	0	urban	0	urban	urban	0	urban	0	no	0	no	0
55	El-Hilla	31	desert	1	desert, agriculutre	0	desert, agriculutre	desert, agriculture	1	agriculture	1	yes	1	no	0
56	Zarnikh	31	desert	1	agriulture	0	agriulture	agriulture	1	agriculture	1	yes	1	yes	1
57	Temple of Kom Mir	31	agriculutre	1	agriculutre, urban	0	agriculutre, urban	agriculture, urban	1	urban	1	yes	1	not possibile to estimate
58	El-'Adayma	31	desert	1	agriculutre	0	agriculutre	agriculutre	1	agriculture	1	yes	1	yes	1
59	Hagir El-Qaraya	31	desert	1	desert, agriculutre	0	desert, agriculutre	desert, agriculture	1	agriculture	1	yes	1	yes	1
60	Necropolis fo Fish	5?,31	desert, agriculutre	0	desert, agriculutre	0	desert, agriculutre	desert, agriculture	0	desert, agriculture	0	no	0	no	0
61	Gazelles Necropolis	31	desert, agriculutre	0	desert, agriculutre	0	desert, agriculutre	desert, agriculutre	1	desert, agriculture, urban	1	yes	1	no	0
62	Necropolis of Buel	31	desert, agriculutre	0	desert, agriculutre	0	desert, agriculutre	desert, agriculture	1	agriculture	1	yes	1	no	0
63	Tafnis	31	urban	0	urban	0	urban	urban	0	urban	0	no	0	not possibile to estimate
	sum			16		3			37		44		35		24
				0.253968		0.047619			0.587302		0.698413		0.555556		0.380952
